# Supplementary material
Source: publisher figshare collection journal article supplement (https://wiley.figshare.com/ndownloader/files/14946113)
Supplement: Supplementary file 1 [file 14946113]

# The comparative biogeography of Philippine geckos challenges predictions from a paradigm of climate-driven vicariant diversification across an island archipelago

Jamie R. Oaks<sup>1</sup>   Cameron D. Siler<sup>2</sup>   Rafe M. Brown<sup>3</sup>

<sup>1</sup>Department of Biological Sciences & Museum of Natural History, Auburn University,  
Auburn, Alabama 36849, USA

<sup>2</sup>Sam Noble Oklahoma Museum of Natural History and Department of Biology, University of  
Oklahoma, Norman, Oklahoma 73072-7029

<sup>3</sup>Biodiversity Institute and Department of Ecology and Evolutionary Biology, University of  
Kansas, Lawrence, Kansas 66045, USA

April 19, 2019

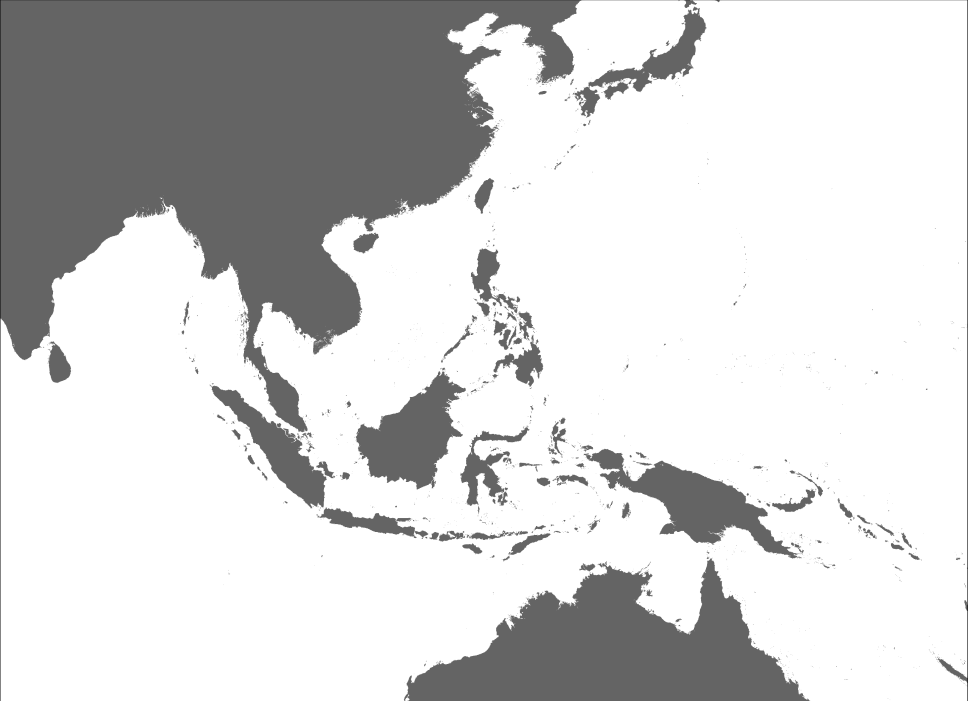

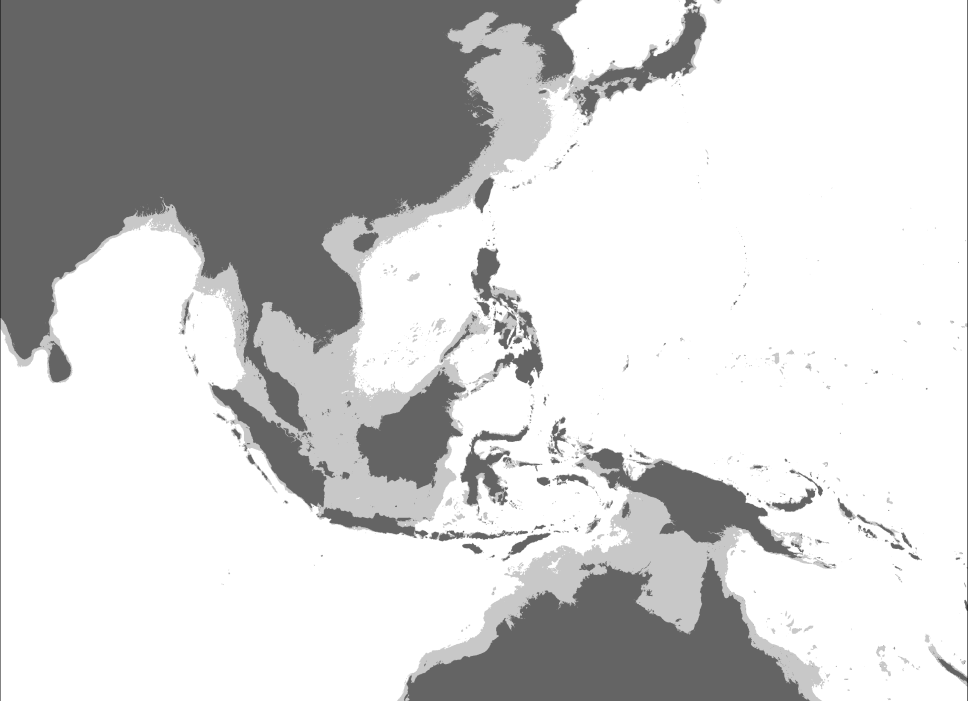

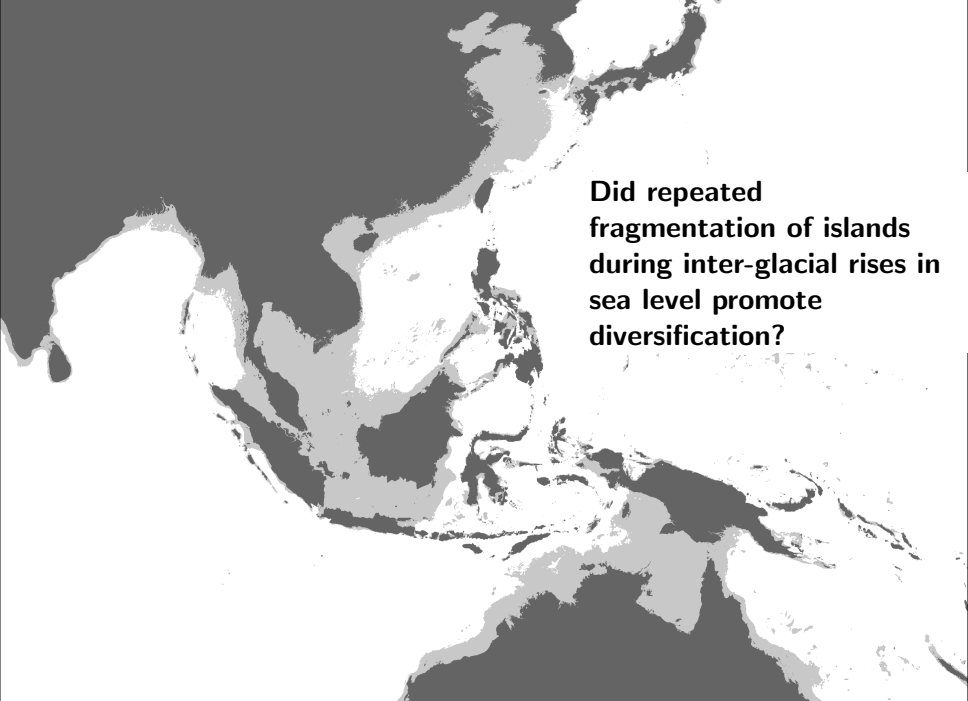

**Did repeated  
fragmentation of islands  
during inter-glacial rises in  
sea level promote  
diversification?**

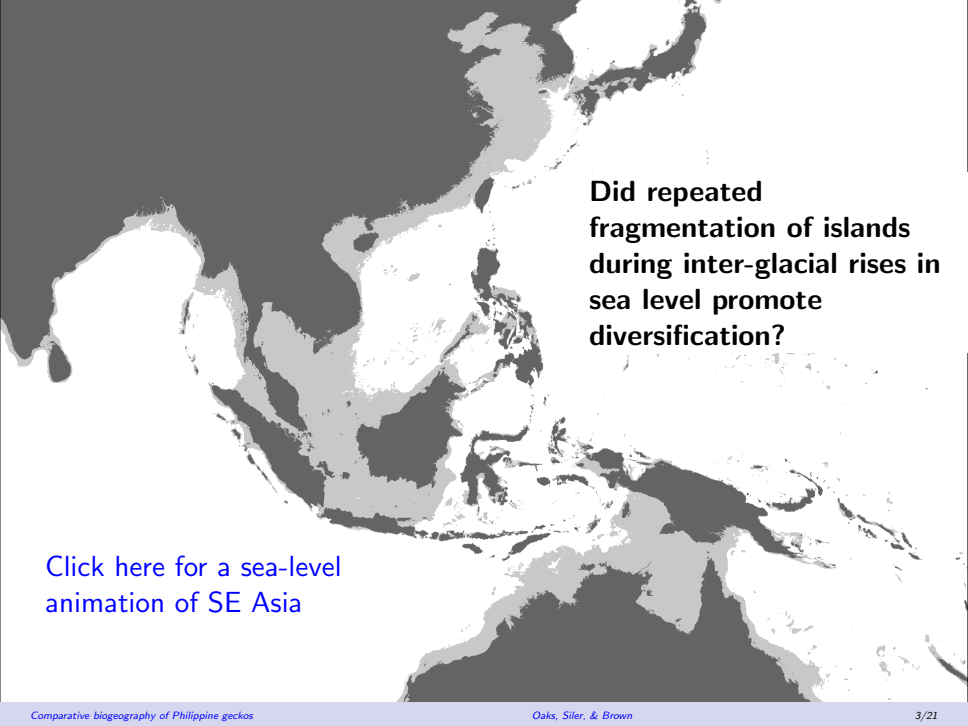

**Did repeated  
fragmentation of islands  
during inter-glacial rises in  
sea level promote  
diversification?**

[Click here for a sea-level  
animation of SE Asia](#)

“Species-pump” Hypothesis Repeated climate-driven fragmentation of the Philippine Islands was a primary mechanism of speciation for terrestrial fauna

**“Species-pump” Hypothesis** Repeated climate-driven fragmentation of the Philippine Islands was a primary mechanism of speciation for terrestrial fauna

**Prediction** Taxa co-distributed across islands within the same Pleistocene aggregate island complex (PAIC) will have divergence times that tend to be clustered around times when sea levels fragmented the islands

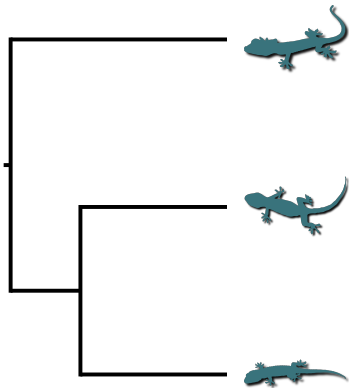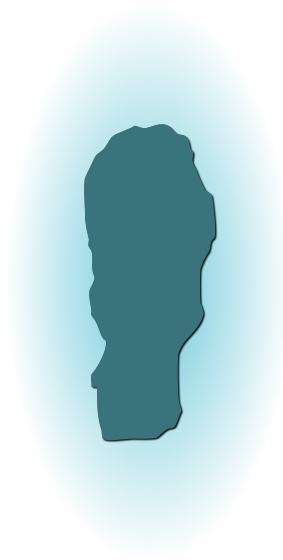



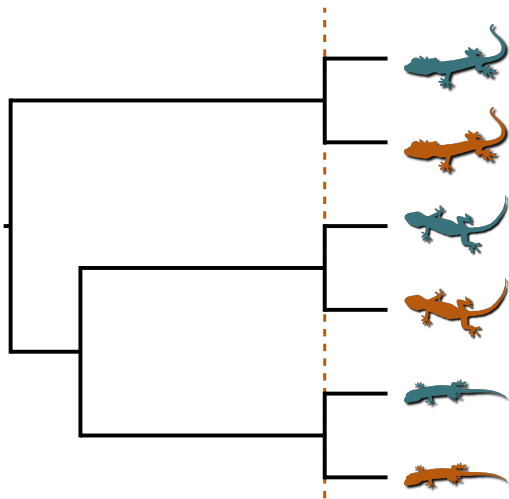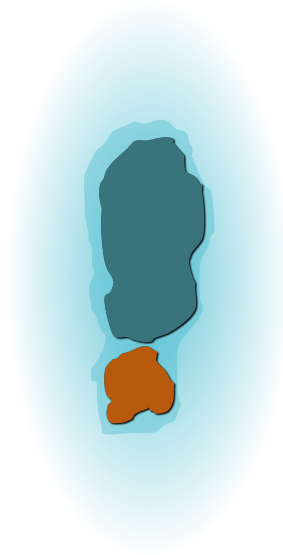

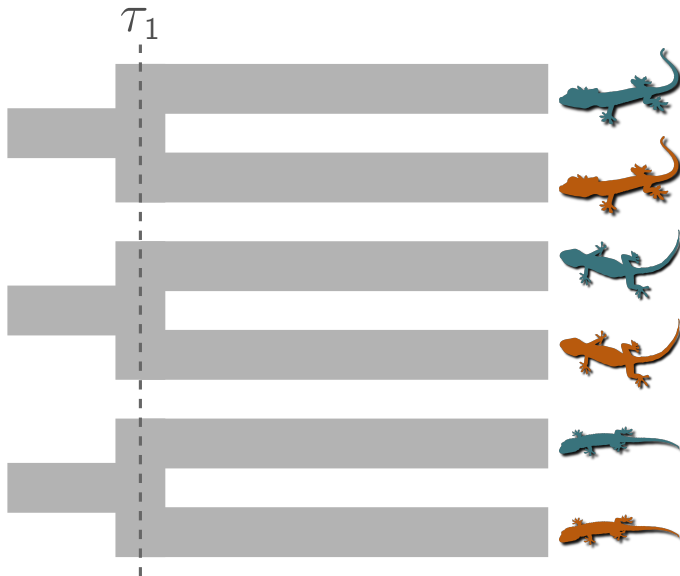

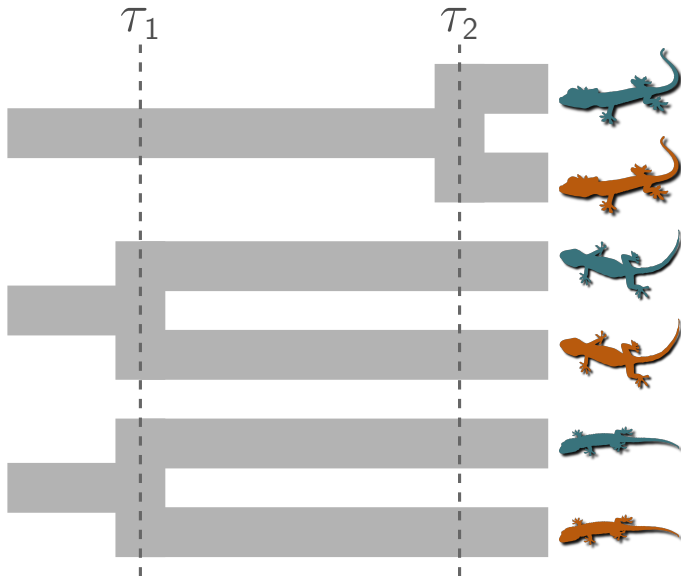

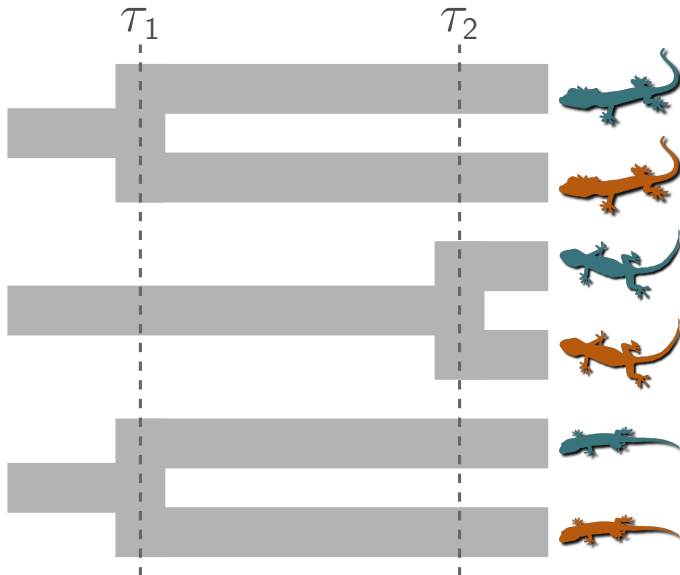

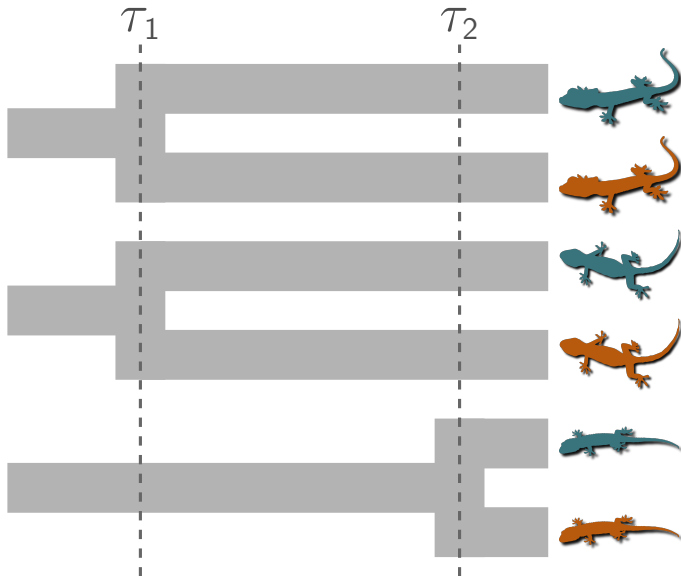

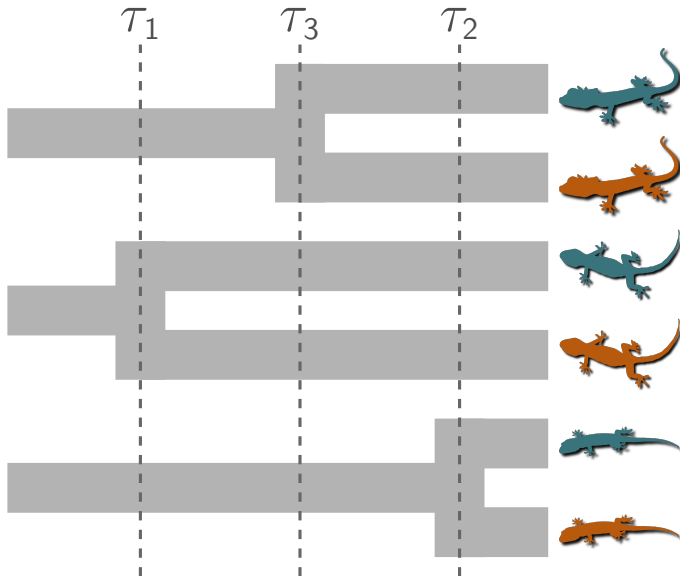

$m_1$ 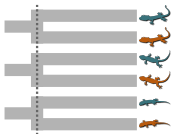 $m_2$ 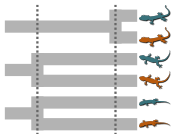 $m_3$ 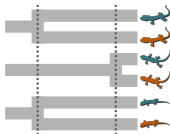 $m_4$ 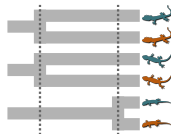 $m_5$ 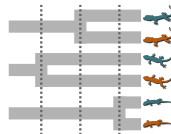

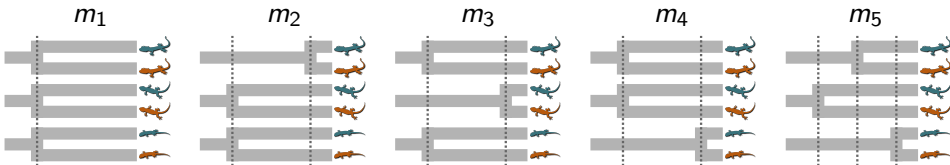

We want to infer the model and divergence times given genetic data



# Previous tests of “species-pump”

- ▶ Oaks et al. (2013)<sup>1</sup> collected mitochondrial DNA sequences from 22 pairs of populations (including bats, shrews, skinks, geckos, snakes, and frogs)

---

<sup>1</sup> J. R. Oaks et al. (2013). *Evolution* 67: 991–1010. <sup>2</sup> W. Huang et al. (2011). *BMC Bioinformatics* 12: 1.

# Previous tests of “species-pump”

- ▶ Oaks et al. (2013)<sup>1</sup> collected mitochondrial DNA sequences from 22 pairs of populations (including bats, shrews, skinks, geckos, snakes, and frogs)
  - ▶ Analyzed these data with ABC method msBayes<sup>2</sup>

---

<sup>1</sup> J. R. Oaks et al. (2013). *Evolution* 67: 991–1010. <sup>2</sup> W. Huang et al. (2011). *BMC Bioinformatics* 12: 1.

# Previous tests of “species-pump”

- ▶ Oaks et al. (2013)<sup>1</sup> collected mitochondrial DNA sequences from 22 pairs of populations (including bats, shrews, skinks, geckos, snakes, and frogs)
  - ▶ Analyzed these data with ABC method msBayes<sup>2</sup>
  - ▶ Found strong support for shared divergences across taxa (results below for 9 pairs from islands of Negros and Panay)

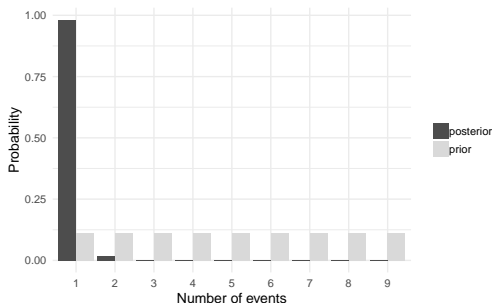

<sup>1</sup> J. R. Oaks et al. (2013). *Evolution* 67: 991–1010. <sup>2</sup> W. Huang et al. (2011). *BMC Bioinformatics* 12: 1.

# Previous tests of “species-pump”

- ▶ Oaks et al. (2013)<sup>1</sup> collected mitochondrial DNA sequences from 22 pairs of populations (including bats, shrews, skinks, geckos, snakes, and frogs)
  - ▶ Analyzed these data with ABC method msBayes<sup>2</sup>
  - ▶ Found strong support for shared divergences across taxa (results below for 9 pairs from islands of Negros and Panay)
  - ▶ But, method was very sensitive to prior assumptions and often biased toward estimating co-divergences



<sup>1</sup> J. R. Oaks et al. (2013). *Evolution* 67: 991–1010. <sup>2</sup> W. Huang et al. (2011). *BMC Bioinformatics* 12: 1.

# Previous tests of “species-pump”

- ▶ Oaks (2014)<sup>1</sup> reanalyzed the data from Oaks et al. (2013)<sup>2</sup> with a modified ABC method dpp-msbayes

---

<sup>1</sup> J. R. Oaks (2014). *BMC Evolutionary Biology* 14: 150. <sup>2</sup> J. R. Oaks et al. (2013). *Evolution* 67: 991–1010.

# Previous tests of “species-pump”

- ▶ Oaks (2014)<sup>1</sup> reanalyzed the data from Oaks et al. (2013)<sup>2</sup> with a modified ABC method dpp-msbayes
  - ▶ New method was less biased, but little information in summary statistics to inform divergence times

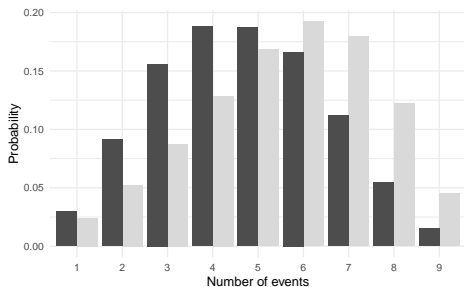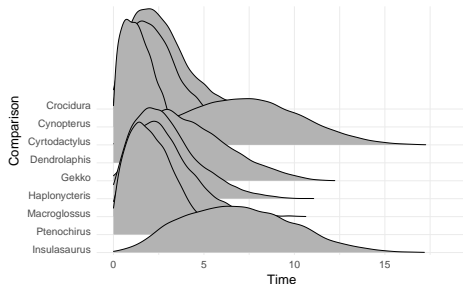

<sup>1</sup> J. R. Oaks (2014). *BMC Evolutionary Biology* 14: 150. <sup>2</sup> J. R. Oaks et al. (2013). *Evolution* 67: 991–1010.

# Previous tests of “species-pump”

- ▶ Oaks (2014)<sup>1</sup> reanalyzed the data from Oaks et al. (2013)<sup>2</sup> with a modified ABC method dpp-msbayes
  - ▶ New method was less biased, but little information in summary statistics to inform divergence times



What now? We need **more data** and/or an **improved method** that better utilizes the information in those data.

<sup>1</sup> J. R. Oaks (2014). *BMC Evolutionary Biology* 14: 150. <sup>2</sup> J. R. Oaks et al. (2013). *Evolution* 67: 991–1010.

# Previous tests of “species-pump”

- ▶ Oaks (2014)<sup>1</sup> reanalyzed the data from Oaks et al. (2013)<sup>2</sup> with a modified ABC method dpp-msbayes
  - ▶ New method was less biased, but little information in summary statistics to inform divergence times

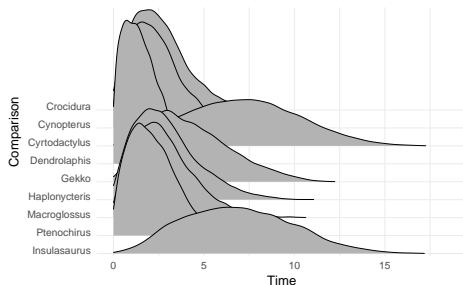

What now? We need **more data** and/or an **improved method** that better utilizes the information in those data. **Our goal is to do both.**

<sup>1</sup> J. R. Oaks (2014). *BMC Evolutionary Biology* 14: 150. <sup>2</sup> J. R. Oaks et al. (2013). *Evolution* 67: 991–1010.



# *Cyrtodactylus* (Gekkonidae)

- ▶ 265+ species across Asia
- ▶ 10+ species across Philippines
- ▶ Nocturnal, scansorial lizards that eat terrestrial invertebrates
- ▶ Specialized bent toes for climbing

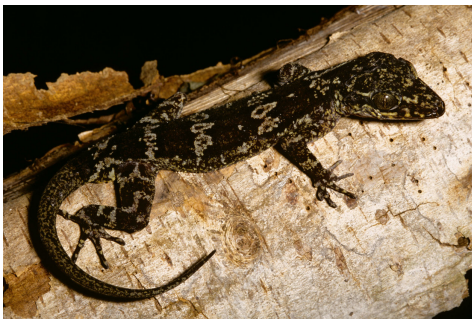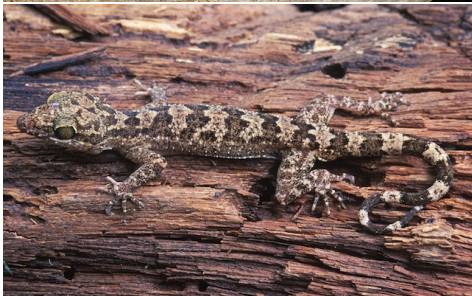

# Gekko (Gekkonidae)

- ▶ 60+ species across Southeast Asia
- ▶ 14+ species across Philippines
- ▶ Nocturnal, scansorial lizards that eat terrestrial invertebrates
- ▶ Subdigital lamellae for climbing

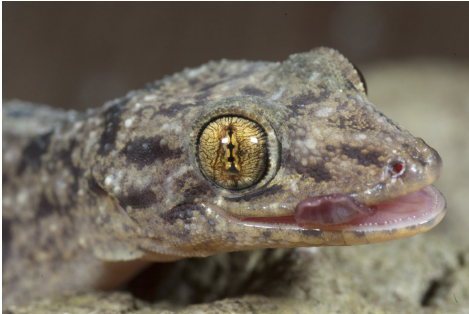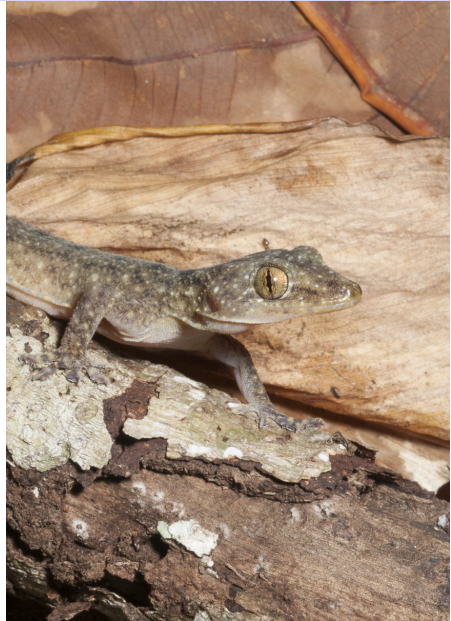

# Methods

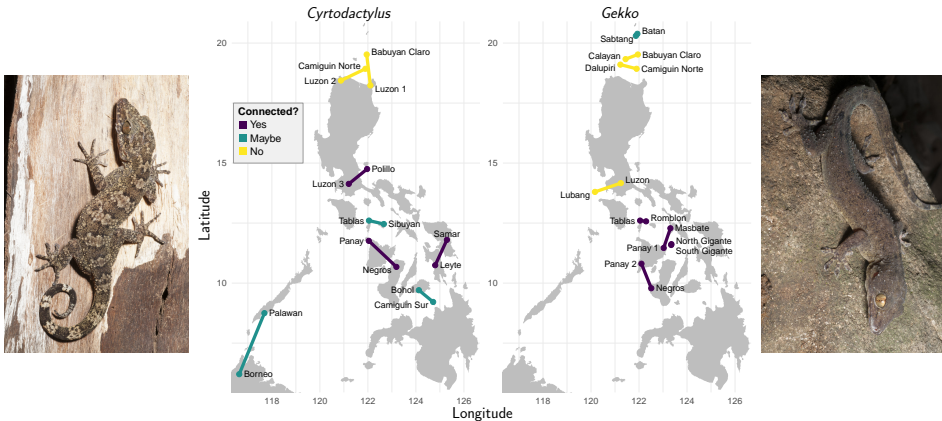

- ▶ Sampled individuals from 8 pairs of populations for both *Cyrtodactylus* and *Gekko*
  - ▶ Sampled 2–5 individuals per population
- ▶ Collected genome-wide DNA sequence data from each individual
  - ▶ Restriction-site-associated DNA sequencing (RADseq)

Analyzed RADseq data with full-likelihood Bayesian comparative phylogeographic method:

**Ecoevolity**: Estimating evolutionary coevality

Analyzed RADseq data with full-likelihood Bayesian comparative phylogeographic method:

## Ecoevolity: Estimating evolutionary coevality

- ▶ Used simulations to assess how well ecoevolity works given the gekkonid RADseq data sets

# Results: *Cyrtodactylus*

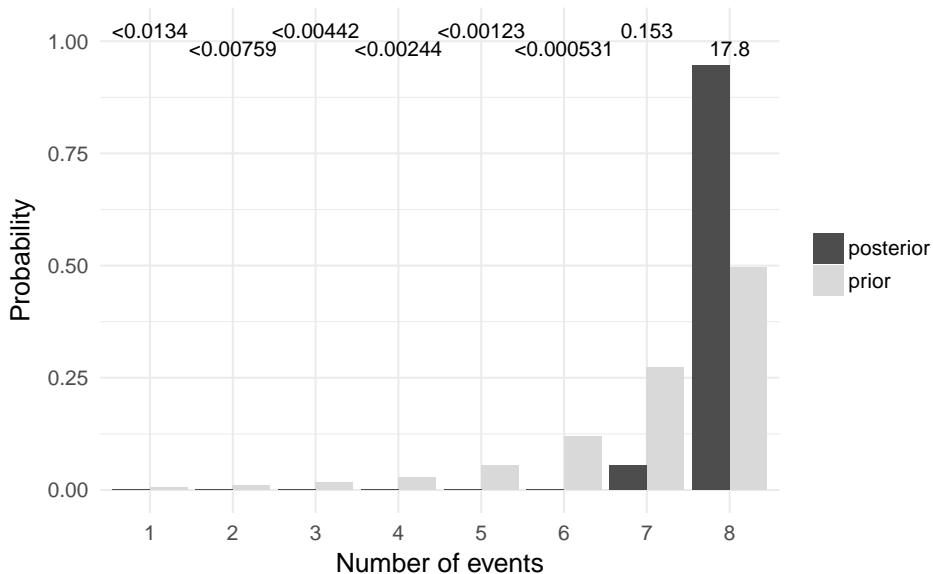

# Results: *Cyrtodactylus*

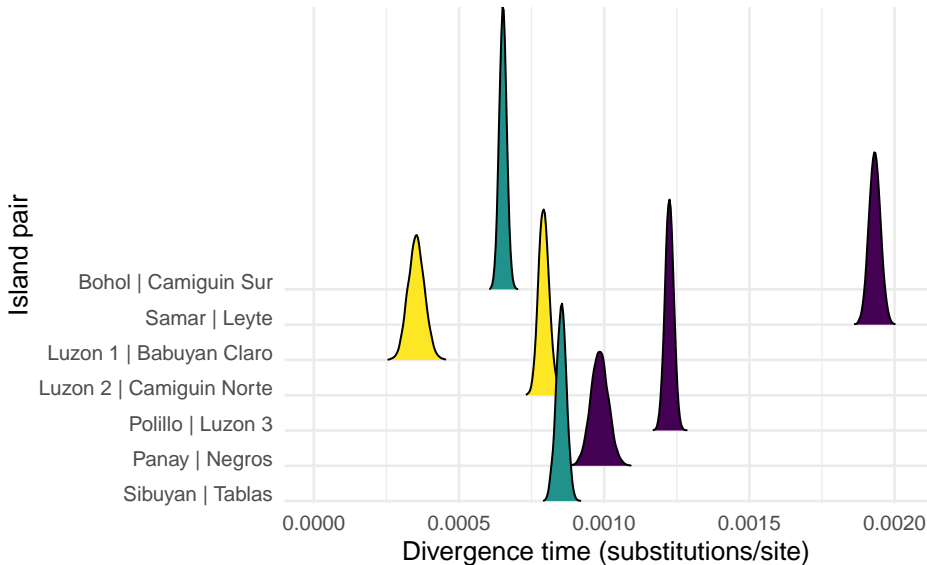

# Results: *Gekko*

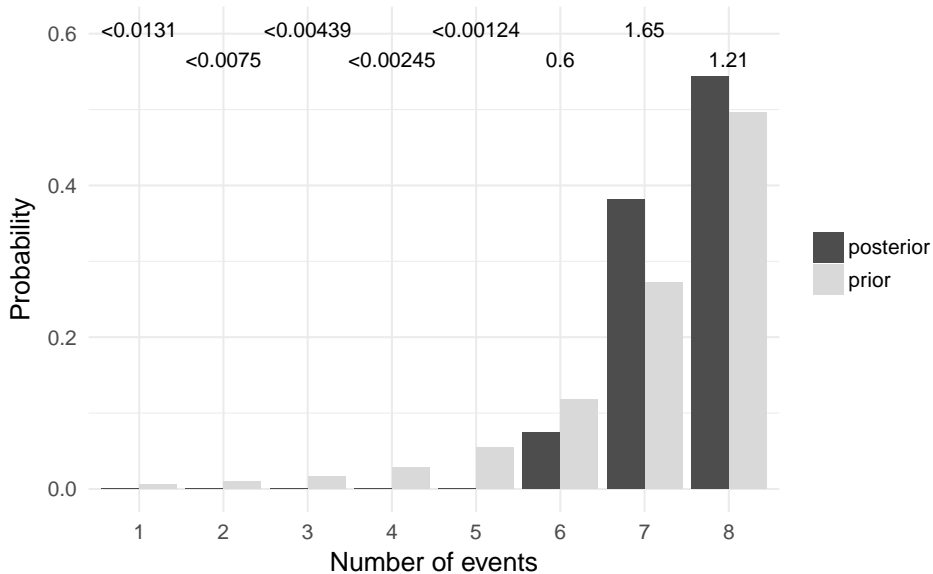



# Results: *Gekko*

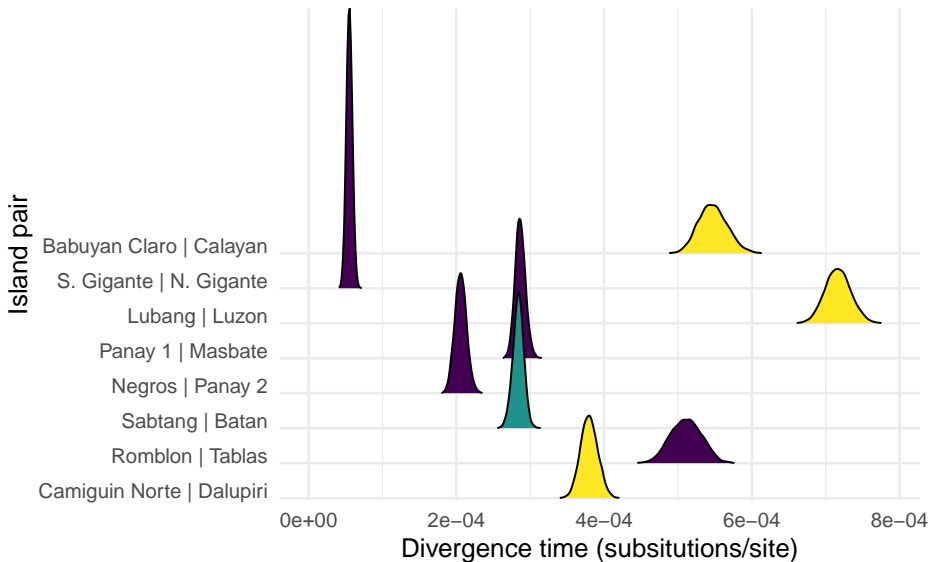

# Key findings

- ▶ Strong support that all 8 pairs of *Cyrtodactylus* populations diverged independently

# Key findings

- ▶ Strong support that all 8 pairs of *Cyrtodactylus* populations diverged independently
- ▶ Weak support that all 8 pairs of *Gekko* populations diverged independently

# Key findings

- ▶ Strong support that all 8 pairs of *Cyrtodactylus* populations diverged independently
- ▶ Weak support that all 8 pairs of *Gekko* populations diverged independently
- ▶ Simulation results suggest *ecoevolity* can accurately estimate the timing and number of divergences given the gekkonid RADseq data

# Caveats

- ▶ Too few island pairs to rule out climate-driven vicariant speciation
- ▶ Differences in divergence times could be due to variation in fragmentation times among island pairs
- ▶ Differences in divergence could also be due to variation in mutation rates

# Caveats

- ▶ Too few island pairs to rule out climate-driven vicariant speciation
- ▶ Differences in divergence times could be due to variation in fragmentation times among island pairs
- ▶ Differences in divergence could also be due to variation in mutation rates
  
- ▶ Seems safe to conclude that the “species-pump” is not the rule for gekkonids, but maybe the exception

# Take home points

- ▶ Support against the “species-pump” hypothesis

# Take home points

- ▶ Support against the “species-pump” hypothesis
- ▶ Results suggest repeated cycles of climate-driven island fragmentation were not an important mechanism of speciation for gekkonid lizards in the Philippines



# Take home points

- ▶ Support against the “species-pump” hypothesis
- ▶ Results suggest repeated cycles of climate-driven island fragmentation were not an important mechanism of speciation for gekkonid lizards in the Philippines
- ▶ Rare over-water dispersal via rafting on vegetation is likely an important mechanism responsible for the distribution of gekkonid lizards in the Philippines

# Everything is on GitHub...

## Software:

- ▶ Ecoevolity: <https://github.com/phyletica/ecoevolity>

## Open-Science Notebook:

- ▶ Gecko RADseq: <https://github.com/phyletica/gekgo>

# Acknowledgments

## Ideas and feedback:

- ▶ Phyletica Lab (the Phyleticians)
- ▶ Constructive feedback from Editor-in-Chief Mohamed Noor, Associate Editor David Weisrock, and four anonymous reviewers greatly improved this work

## Lab work:

- ▶ Patrick Monnahan and John Kelly for their help with the MSG libraries

## Computation:

- ▶ Alabama Supercomputer Authority
- ▶ Auburn University Hopper Cluster

## Funding:

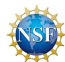

## Photo credits:

- ▶ Rafe Brown and Cam Siler
- ▶ [PhyloPic!](#)

# Questions?

[joaks@auburn.edu](mailto:joaks@auburn.edu)

[phyletica.org](http://phyletica.org)

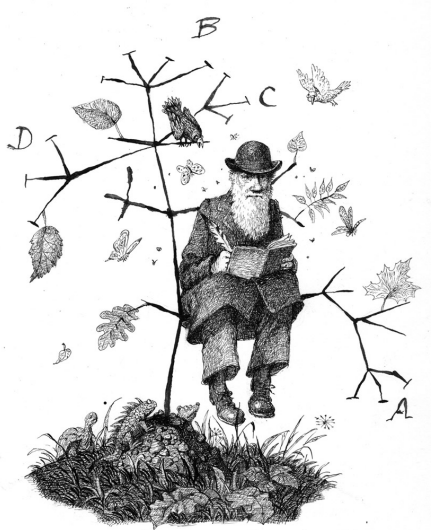

© 2007 Boris Kulikov [boris-kulikov.blogspot.com](http://boris-kulikov.blogspot.com)
